# Supplementary material for: Adaptive introgression between Anopheles sibling species eliminates a major genomic island but not reproductive isolation
Source: PubMed Central journal article supplement — Nat Commun. 2014 Jun 25;5:4248. doi: 10.1038/ncomms5248 (PMC4086683; doi:10.1038/ncomms5248), 2014-06-25
Supplement: ncomms5248-s1.pdf [file ncomms5248-s1.pdf]

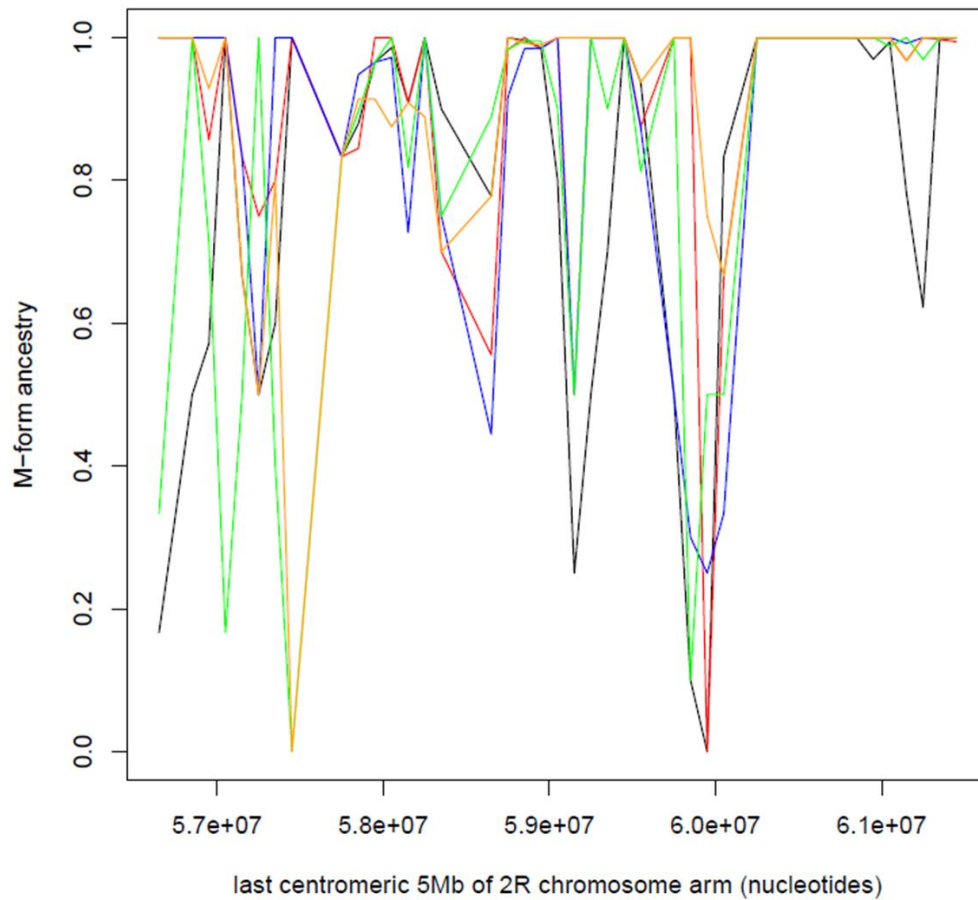

**Supplementary figure 1 | Analysis of recombination beyond the 2L genomic island.** Lines show proportionate M form ancestry for each individual in the *M-kdr* group based on ancestry informative markers (fully diagnostic of M and S) on the centromere proximate 5Mb of the 2R chromosome arm.

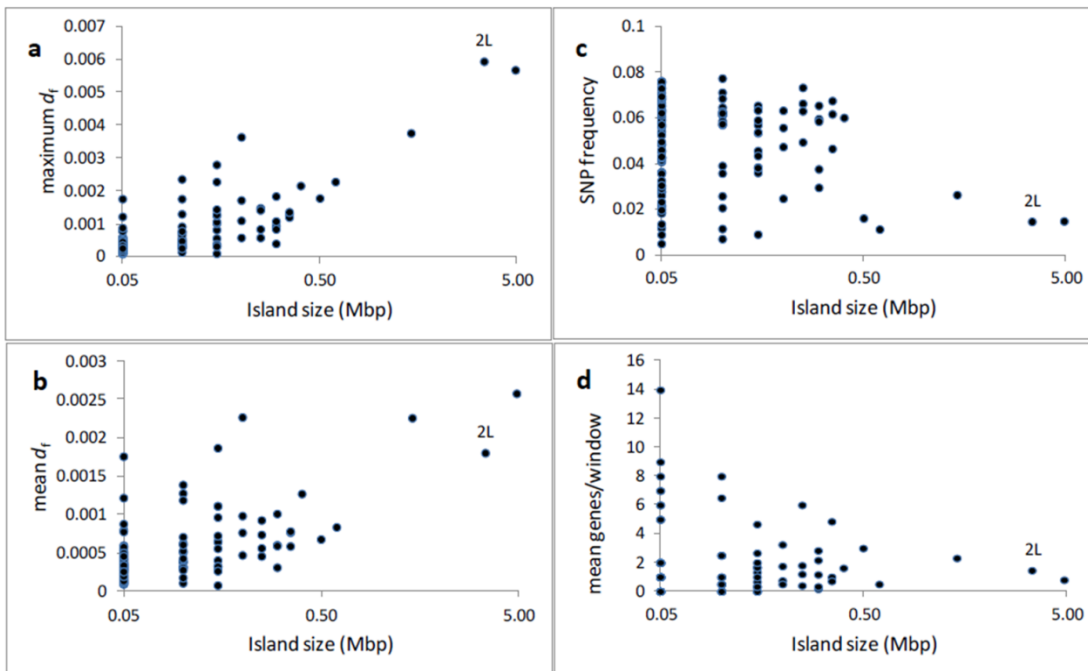

**Supplementary figure 2 | Scatterplots showing the relationships between the size of divergent genomic islands and descriptive statistics for diversity and differentiation.** Plots demonstrate the relationship between island size and **(a)** Maximum  $d_f$ , **(b)** Mean  $d_f$ , **(c)** SNP frequency within islands and **(d)** the mean number of genes per window. Points in each plot points are islands (total N=117). Owing to heterogeneity in island size a log scale is used in each plot; the major 2L genomic island is indicated.

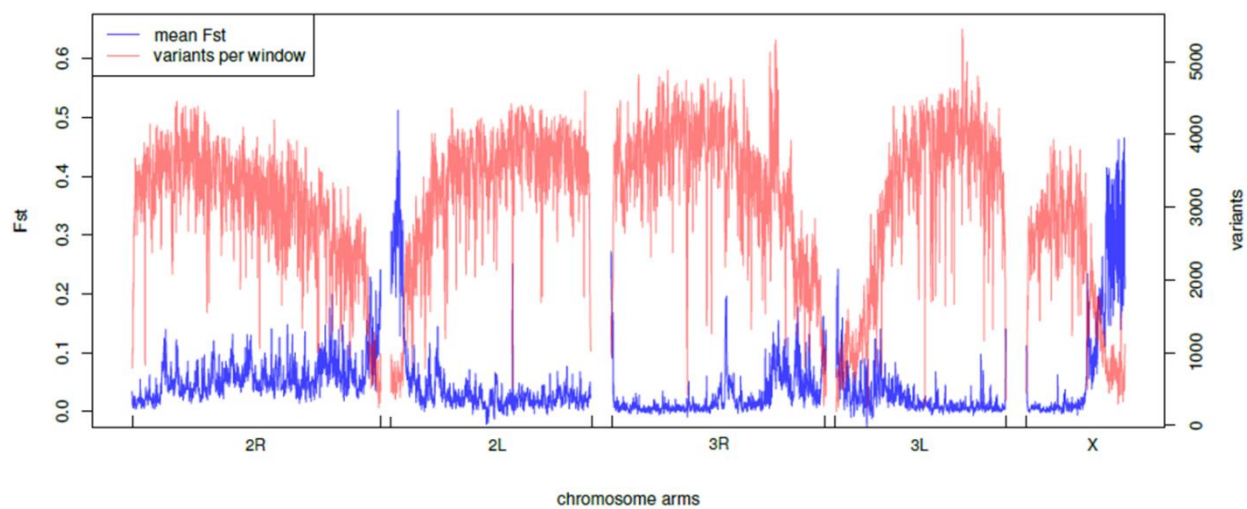

**Supplementary figure 3 |  $F_{ST}$ -based pairwise divergence between M-wt and S *A. gambiae* with number of variants per window.** The plot describes mean  $F_{ST}$  (blue) and the number of variants (red) in 100 SNP stepping windows across the whole genome (all chromosome arms) for M-wt vs. S.

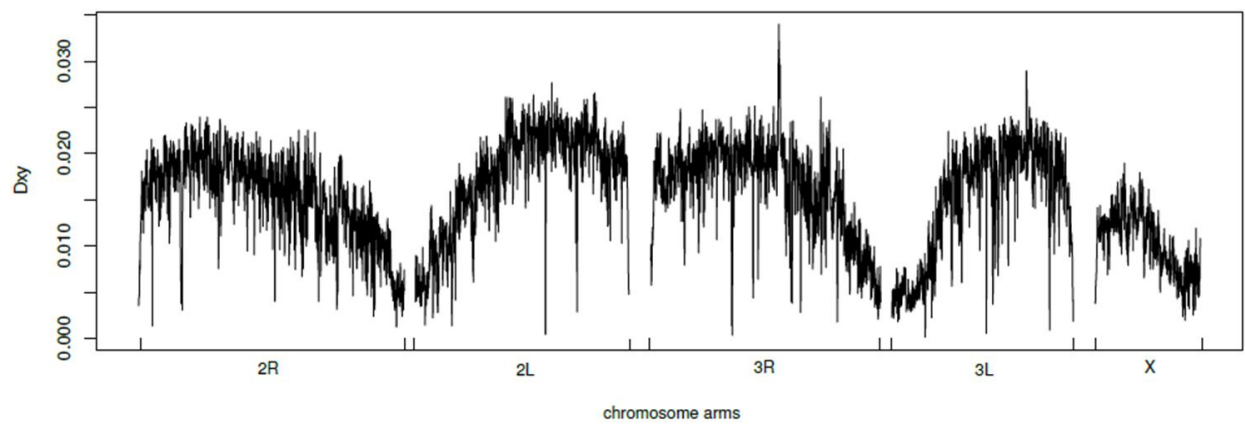

**Supplementary figure 4 | Dxy-based pairwise divergence between M-wt and S *A. gambiae*.** Dxy calculated between M-wt and S *A. gambiae* across the genome (all chromosome arms) in 50kb stepping windows.

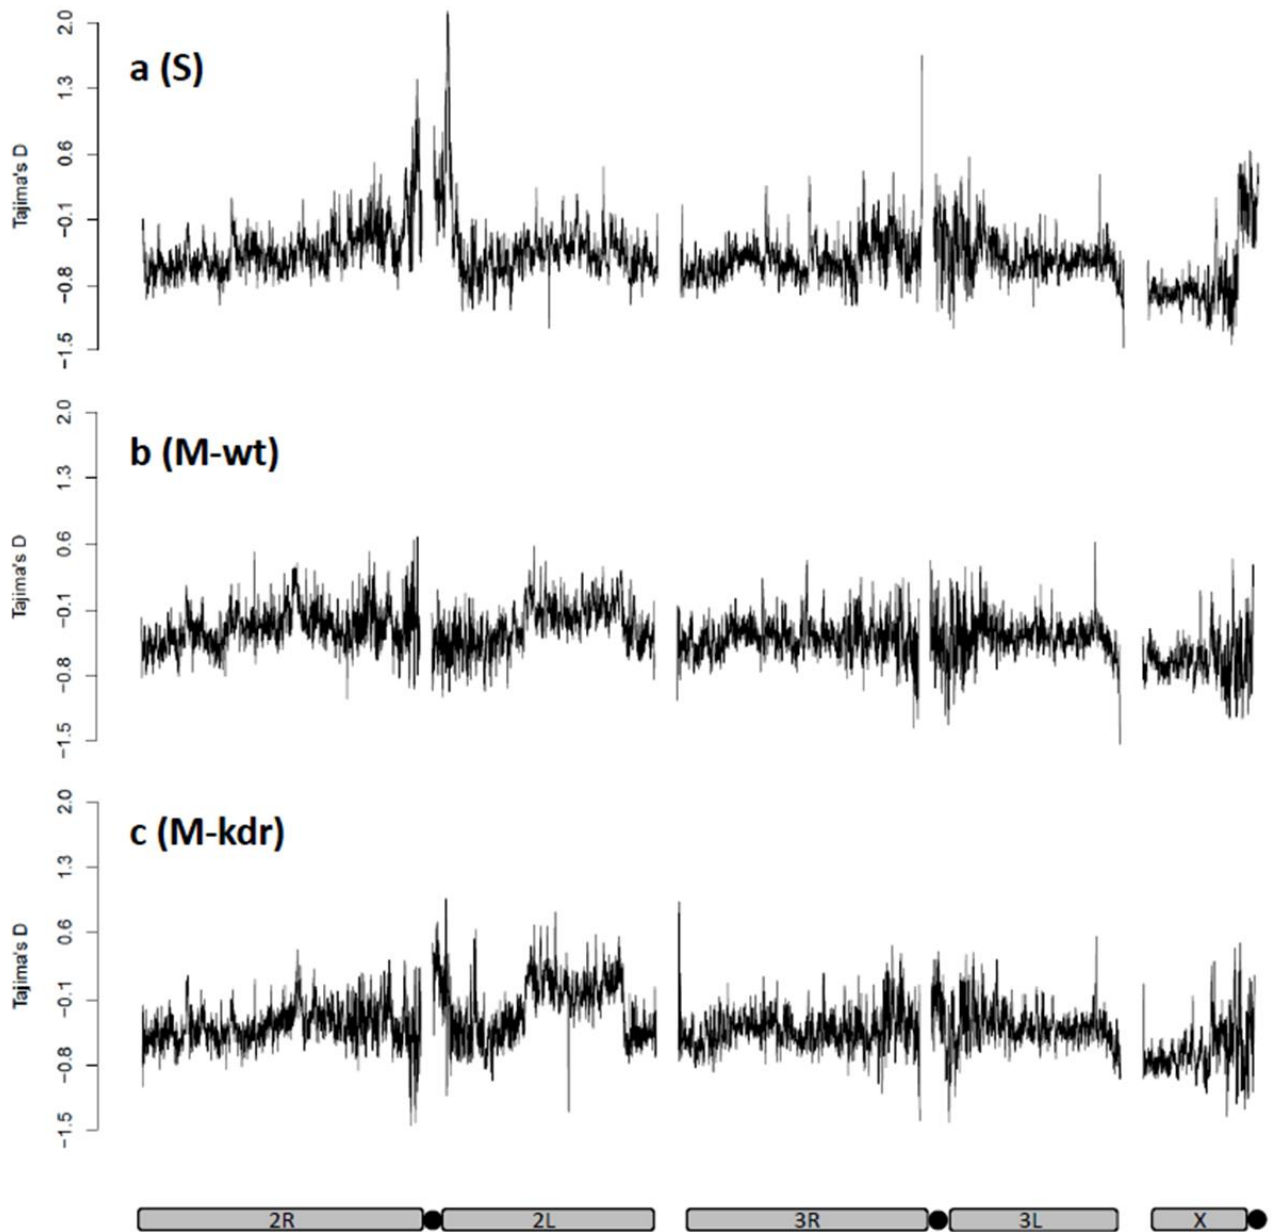

**Supplementary figure 5 | Whole genome Tajima's D for the three groupings of *A. gambiae*.** Plots are based on Tajima's D calculated in 50kb stepping windows for (a) S form, (b) M-wt and (c) M-kdr. Chromosomes are shown by solid grey bars and centromere positions by black circles.

| <b>Supplementary Table 1   Statistics associated with kernel plots of chromosomal differentiation</b> |             |             |             |             |             |
|-------------------------------------------------------------------------------------------------------|-------------|-------------|-------------|-------------|-------------|
|                                                                                                       | 2L          | 2R          | 3L          | 3R          | X           |
| Mean $F_{ST}$                                                                                         | 0.0294      | 0.0545      | 0.0171      | 0.0225      | 0.0453      |
| $F_{ST}$ 95% CI $\pm$                                                                                 | 0.0006      | 0.0004      | 0.0004      | 0.0004      | 0.0018      |
| Sample Skewness (G1)                                                                                  | 4.362       | 1.367       | 2.440       | 2.495       | 2.870       |
| Standard Error Skewness (SES)                                                                         | 0.014       | 0.013       | 0.015       | 0.013       | 0.024       |
| Skew Zg1 (test stat) = G1/SES                                                                         | 316.9       | 106.5       | 158.3       | 192.3       | 118.6       |
| Skew inference $\alpha=0.05$                                                                          | positive    | positive    | positive    | positive    | positive    |
| Level of skewness inference                                                                           | high        | high        | high        | high        | high        |
| Sample Excess Kurtosis (G2)                                                                           | 32.7        | 3.4         | 11.5        | 9.7         | 8.8         |
| Standard Error Kurtosis (SEK)                                                                         | 0.028       | 0.026       | 0.031       | 0.026       | 0.048       |
| Kurtosis Zg2 (test stat) = G2/SEK                                                                     | 1186.5      | 132.0       | 374.0       | 372.6       | 181.6       |
| Excess Kurtosis Inference $\alpha=0.05$                                                               | positive    | positive    | positive    | positive    | positive    |
| Direction                                                                                             | leptokurtic | leptokurtic | leptokurtic | leptokurtic | leptokurtic |

| <b>Supplementary Table 2   Relationships between island descriptive statistics</b> |              |              |              |             |              |
|------------------------------------------------------------------------------------|--------------|--------------|--------------|-------------|--------------|
|                                                                                    | size         | $d_f$ _mean  | $d_f$ _max   | SNPs/window | genes/window |
| size                                                                               |              | <<0.001      | <<0.001      | 0.823       | 0.648        |
| $d_f$ _mean                                                                        | <b>0.564</b> |              | <<0.001      | 0.001       | 0.833        |
| $d_f$ _max                                                                         | <b>0.656</b> | <b>0.983</b> |              | 0.004       | 0.674        |
| SNPs/window                                                                        | -0.021       | <b>0.300</b> | <b>0.266</b> |             | 0.343        |
| genes/window                                                                       | 0.043        | -0.020       | -0.039       | -0.088      |              |

| Supplementary Table 3   DAVID annotation term clustering results |                                                                 |       |      |          |                                                            |            |          |           |                 |            |           |          |
|------------------------------------------------------------------|-----------------------------------------------------------------|-------|------|----------|------------------------------------------------------------|------------|----------|-----------|-----------------|------------|-----------|----------|
|                                                                  |                                                                 |       |      |          |                                                            |            |          |           |                 |            |           |          |
| <b>Annotation Cluster 1</b>                                      | <b>Enrichment Score: 2.67 (&gt;1.3 regarded as significant)</b> |       |      |          |                                                            |            |          |           |                 |            |           |          |
| Category                                                         | Term                                                            | Count | %    | P-Value  | Genes                                                      | List Total | Pop Hits | Pop Total | Fold Enrichment | Bonferroni | Benjamini | FDR      |
| GOTERM_MF_FAT                                                    | GO:0008061~chitin binding                                       | 5     | 7.04 | 6.34E-04 | AGAP000986, AGAP000987, AGAP000988, AGAP000989, AGAP001006 | 29         | 78       | 5399      | 11.93413        | 0.04466    | 0.022585  | 0.658317 |
| GOTERM_MF_FAT                                                    | GO:0030247~polysaccharide binding                               | 5     | 7.04 | 7.32E-04 | AGAP000986, AGAP000987, AGAP000988, AGAP000989, AGAP001006 | 29         | 81       | 5399      | 11.49212        | 0.051359   | 0.017421  | 0.759325 |
| GOTERM_MF_FAT                                                    | GO:0001871~pattern binding                                      | 5     | 7.04 | 7.32E-04 | AGAP000986, AGAP000987, AGAP000988, AGAP000989, AGAP001006 | 29         | 81       | 5399      | 11.49212        | 0.051359   | 0.017421  | 0.759325 |
| INTERPRO                                                         | IPR002557:Chitin binding protein, peritrophin-A                 | 5     | 7.04 | 8.10E-04 | AGAP000986, AGAP000987, AGAP000988, AGAP000989, AGAP001006 | 52         | 78       | 9418      | 11.60996        | 0.091181   | 0.091181  | 0.922999 |
| SMART                                                            | SM00494:ChtBD2                                                  | 5     | 7.04 | 0.0010   | AGAP000986, AGAP000987, AGAP000988, AGAP000989, AGAP001006 | 27         | 78       | 4403      | 10.45347        | 0.028976   | 0.028976  | 0.852445 |
| GOTERM_BP_FAT                                                    | GO:0006030~chitin                                               | 5     | 7.04 | 0.0015   | AGAP000986,                                                | 25         | 93       | 4335      | 9.322581        | 0.322225   | 0.322225  | 1.961577 |



|                                 |                                                |       |           |        |                                                                                                                                     |               |             |              |                    |            |           |          |
|---------------------------------|------------------------------------------------|-------|-----------|--------|-------------------------------------------------------------------------------------------------------------------------------------|---------------|-------------|--------------|--------------------|------------|-----------|----------|
|                                 | metabolic process                              |       |           |        | AGAP000987,<br>AGAP000988,<br>AGAP000989,<br>AGAP001006                                                                             |               |             |              |                    |            |           |          |
| GOTERM_BP_FAT                   | GO:0006022~aminoglycan<br>metabolic process    | 5     | 7.04      | 0.0025 | AGAP000986,<br>AGAP000987,<br>AGAP000988,<br>AGAP000989,<br>AGAP001006                                                              | 25            | 107         | 4335         | 8.102804           | 0.479508   | 0.278549  | 3.271269 |
| GOTERM_BP_FAT                   | GO:0005976~polysaccharide<br>metabolic process | 5     | 7.04      | 0.0035 | AGAP000986,<br>AGAP000987,<br>AGAP000988,<br>AGAP000989,<br>AGAP001006                                                              | 25            | 117         | 4335         | 7.410256           | 0.595188   | 0.260251  | 4.50176  |
| GOTERM_CC_FAT                   | GO:0005576~extracellular<br>region             | 5     | 7.04      | 0.2330 | AGAP000986,<br>AGAP000987,<br>AGAP000988,<br>AGAP000989,<br>AGAP001006                                                              | 24            | 227         | 2096         | 1.923642           | 0.999995   | 0.997763  | 91.85548 |
|                                 |                                                |       |           |        |                                                                                                                                     |               |             |              |                    |            |           |          |
| <b>Annotation<br/>Cluster 2</b> | <b>Enrichment Score: 0.44</b>                  |       |           |        |                                                                                                                                     |               |             |              |                    |            |           |          |
| Category                        | Term                                           | Count | %         | PValue | Genes                                                                                                                               | List<br>Total | Pop<br>Hits | Pop<br>Total | Fold<br>Enrichment | Bonferroni | Benjamini | FDR      |
| GOTERM_MF_FAT                   | GO:0046872~metal ion<br>binding                | 10    | 14.0<br>8 | 0.3232 | AGAP000958,<br>AGAP001015,<br>AGAP000954,<br>AGAP000952,<br>AGAP000974,<br>AGAP000971,<br>AGAP000983,<br>AGAP000996,<br>AGAP000984, | 29            | 1444        | 5399         | 1.289283           | 1          | 0.996379  | 98.28042 |

|               |                           |    |       |        |                                                                                                                                                   |    |      |      |          |   |         |          |
|---------------|---------------------------|----|-------|--------|---------------------------------------------------------------------------------------------------------------------------------------------------|----|------|------|----------|---|---------|----------|
|               |                           |    |       |        | AGAP000946                                                                                                                                        |    |      |      |          |   |         |          |
| GOTERM_MF_FAT | GO:0043167~ion binding    | 10 | 14.08 | 0.3765 | AGAP000958,<br>AGAP001015,<br>AGAP000954,<br>AGAP000952,<br>AGAP000974,<br>AGAP000971,<br>AGAP000983,<br>AGAP000996,<br>AGAP000984,<br>AGAP000946 | 29 | 1508 | 5399 | 1.234565 | 1 | 0.99655 | 99.26827 |
| GOTERM_MF_FAT | GO:0043169~cation binding | 10 | 14.08 | 0.3765 | AGAP000958,<br>AGAP001015,<br>AGAP000954,<br>AGAP000952,<br>AGAP000974,<br>AGAP000971,<br>AGAP000983,<br>AGAP000996,<br>AGAP000984,<br>AGAP000946 | 29 | 1508 | 5399 | 1.234565 | 1 | 0.99655 | 99.26827 |

| Supplementary Table 4   Samples used for whole genome sequencing |                |             |          |           |      |                    |
|------------------------------------------------------------------|----------------|-------------|----------|-----------|------|--------------------|
| origin                                                           | location       | date        | latitude | longitude | form | <i>Vgsc L1014F</i> |
| Ghana                                                            | Dawhenya       | summer 2007 | 5.556    | -0.19631  | M    | FF                 |
| Ghana                                                            | Okyereko       | summer 2010 | 5.417    | -0.600    | M    | FF                 |
| Ghana                                                            | Okyereko       | summer 2010 | 5.417    | -0.600    | M    | FF                 |
| Ghana                                                            | Okyereko       | summer 2010 | 5.417    | -0.600    | M    | FF                 |
| Ghana                                                            | Okyereko       | summer 2010 | 5.417    | -0.600    | M    | FF                 |
| Ghana                                                            | Dawhenya       | summer 2007 | 5.556    | -0.19631  | M    | LL                 |
| Ghana                                                            | Dawhenya       | summer 2007 | 5.556    | -0.19631  | M    | LL                 |
| Ghana                                                            | Kwamekyer      | summer 2007 | 5.575    | -0.6461   | M    | LL                 |
| Ghana                                                            | Kwamekyer      | summer 2007 | 5.575    | -0.6461   | M    | LL                 |
| Ghana                                                            | Kwamekyer      | summer 2007 | 5.575    | -0.6461   | M    | LL                 |
| Ghana                                                            | Awomberew      | summer 2007 | 5.565    | -0.6527   | S    | FF                 |
| Ghana                                                            | Awomberew      | summer 2007 | 5.565    | -0.6527   | S    | FF                 |
| Ghana                                                            | Gomoa, Onyadzi | summer 2007 | 5.359    | -0.7061   | S    | FF                 |
| Ghana                                                            | Odumasi        | summer 2007 | 5.907    | -0.0833   | S    | FF                 |
| Ghana                                                            | Odumasi        | summer 2007 | 5.907    | -0.0833   | S    | FF                 |
